# Supplementary material
Source: ML conference proceedings conference paper supplement (https://openreview.net/forum?id=C4QNyUqBIu)
Supplement: supplementary_material [file attachment]

# Generating Traffic Matrices

Here we describe how traffic matrices are generated by **tm-gen**. As a starting point we used the gravity-based model from [1], which we briefly rehash here. In that model the volume of traffic ( $T(n_i, n_j)$ ) for each of the  $N(N - 1)$  pairs in the network is obtained by:

$$T(n_i, n_j) = T \frac{T^{in}(n_i)}{\sum_k T^{in}(n_k)} \frac{T^{out}(n_j)}{\sum_k T^{out}(n_k)} \quad (1)$$

where  $T$  is the total traffic in the network. The values  $T^{in}(n_i)$  and  $T^{out}(n_i)$  are drawn from an exponential distribution. This model has been shown to produce realistic traffic matrices, even though it uses only a single parameter—the mean value of the exponential distribution. While it represents a good starting point, we note that this simple approach exhibits a couple of significant drawbacks.

The first one is that there are no guarantees that the network will be able to fit the resulting traffic matrix. The level of saturation of the network depends on both the mean value of the exponential and the actual network topology. On one hand it may be that we pick a mean value that results in a traffic matrix that exceeds the maximum flow of the network—*i.e.*, one for which no routing scheme will ever be able to fit the demand. On the other hand, if we pick a mean value which is too low we will generate a traffic matrix that is trivial—*i.e.*, one for which every aggregate can be completely routed on its shortest path without causing congestion.

Ideally we would like to have better control over the network’s load level. We take the approach of previous work [2], which suggests scaling the traffic matrix after generation in order to set the network’s load to an arbitrary point between the two extremes described above. To do so we first generate a traffic matrix using a random exponential distribution with an arbitrary mean value. We then obtain the minimum maximal link utilization possible under any routing scheme by solving the theoretically optimal MinMax multi-commodity flow problem (e.g., as described here [3]). If this link utilization value is  $u$ , then we know that network is  $1/u$  away from being saturated—*e.g.*, if  $u = 0.3$  then we know that if we scale all demands by  $1/0.3 = 3.3$  we will achieve a maximally loaded network. If instead we want a network which is *e.g.*, 70% saturated we need to scale aggregates by  $\frac{1}{0.7u}$ .

The second issue with the approach in Equation 1 is that it does not take into account geographic distance between ingress and egress pairs. In a lot of scenarios traffic matrices will exhibit a degree of geographic locality [4]—e.g., because big resource providers attempt to locate resources as close as possible to end users. As we would like to explore how LDR

functions in those scenarios as well as the non-local ones, we optionally add a degree of locality to the matrix generated using Equation 1 while preserving its properties.

Crucially, when we add locality to an already generated traffic matrix we want to preserve the values of *both* incoming and outgoing traffic at each node from the original traffic matrix. We use the following LP:

$$\begin{aligned}
& \text{minimize:} && \sum_i \sum_j D_{i,j} B_{i,j}^{new} \\
& \text{subject to:} && B_{i,j}^{old} \max(\{0, 1 - l\}) \leq B_{i,j}^{new} \leq B_{i,j}^{old} (1 + l) && \forall i \in N, \forall j \in N \\
& && \sum_i B_{i,j}^{old} = \sum_i B_{i,j}^{new} && \forall j \in N \quad (2) \\
& && \sum_j B_{i,j}^{old} = \sum_j B_{i,j}^{new} && \forall i \in N \quad (3)
\end{aligned}$$

where  $B_{i,i}^{new}$  is the traffic volume between nodes  $i$  and  $j$  in the new, localized, traffic matrix. The constant  $B_{i,j}^{old}$  is the traffic volumes in the original matrix between nodes  $i$  and  $j$ , the constant  $D_{i,j}$  is the distance of the shortest path between nodes  $i$  and  $j$ . The constant  $l$  is a positive parameter which determines locality. The larger  $l$  is the more freedom the optimizer has to change different aggregates' demands to minimize the total traffic volume per unit of geographic distance—*i.e.*, to make the traffic more local. If  $l$  is 0 the optimizer will be forced to set all  $B^{new}$  equal to  $B^{old}$ . If the parameter is 0.5 the optimizer will be free to move up to 50% of each aggregate's volume to another aggregate. It would seem that as soon as  $l$  reaches 1 the resulting traffic matrix will only have a handful of large aggregates, as the optimizer will seemingly have the ability to move all of the volume of any aggregate to a more local alternative, but notice that the constraints 2 and 3 will force it to preserve the sums of incoming and outgoing traffic at each node, so the resulting matrix will never be too far off the original one.

In summary, the algorithm that we use in **tm-gen** when generating a traffic matrix with a given load and locality is as follows:

1. Using some random seed, generate a traffic matrix using the gravity-based model from [1].
2. Add locality to the generated traffic matrix by solving the LP formulated above. If the locality value is 0, then this step is a no-op.
3. Compute the MinMax link utilization  $u$  in the localized traffic matrix.
4. Scale the traffic matrix so that its load matches the desired one—*e.g.*, if the load we aim for is 70% of the maximal one, we will scale all aggregates' volumes by  $\frac{1}{0.7U}$ .

Notice that adding locality happens before scaling, as that ensures that the resulting traffic matrix has exactly the desired load factor. Except for the second step, the process is identical with the one recommended in [2].

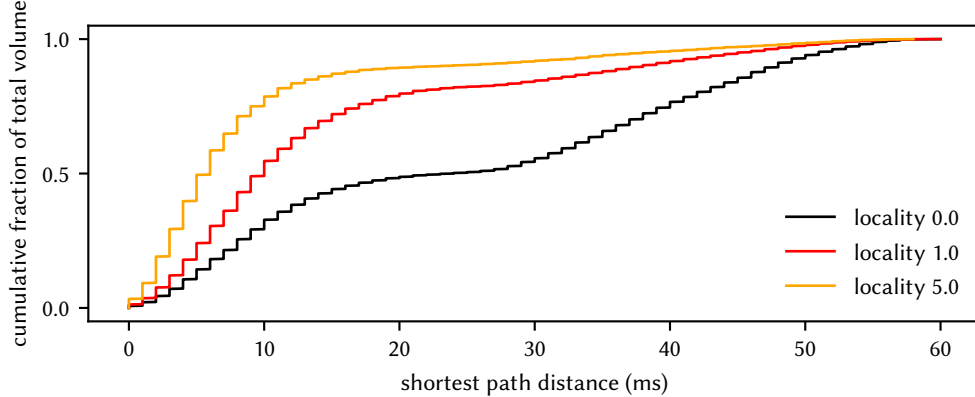

Figure 1: Cumulative fraction of total volume in Cogent’s topology that travels a given shortest-path distance.

To see how the addition of locality in the second step behaves in practice we examine three different traffic matrices generated with the same seed and the same load value, but with three different values of locality—0, 1 and 5. The topology is that of Cogent—the largest one in the TopologyZoo [5] dataset, and one with high LLPD (see [6]). In Figure 1 we show the locality of traffic volume in each of the three traffic matrices. To generate the plot we sort all aggregates based on the length of their shortest path. Each point on the plot is a separate traffic aggregate; the  $x$  value is the length of the aggregate’s shortest path and the  $y$  value is the cumulative fraction of the total traffic volume in the entire traffic matrix.

Cogent’s topology contains large European and North American parts, connected by a handful of long-haul trans-oceanic links which account for the flattening of the LOCALITY 0 curve. Looking at that curve, we can see that 50% of the traffic volume travels 20 ms or less—*i.e.*, about half of all traffic is between Europe and North America. Recent studies of Deutsche Telekom’s network [4] suggest that in large ISPs this is not the case, but instead traffic is significantly more localized. As we increase locality we notice that less and less traffic is being moved between the two continents, loading the long-haul links less and less. At the extreme of LOCALITY 5 only about 10% of all traffic crosses between Europe and North America, with long-haul links being underutilized. We conjecture that this is also not a very realistic scenario. LOCALITY 1, which exhibits an 80/20 split between local and remote traffic, is probably closer to reality.

## References

- [1] Matthew Roughan. Simplifying the synthesis of internet traffic matrices. *Computer Communication Review*, 35(5):93–96, 2005.
- [2] Hamed Haddadi, Olivier Bonaventure, et al. Recent advances in networking. 2013.

- [3] Srikanth Kandula, Dina Katabi, Bruce Davie, and Anna Charny. Walking the tightrope: Responsive yet stable traffic engineering. In *Proc. ACM SIGCOMM 2005*.
- [4] Timmy Schüller, Nils Aschenbruck, Markus Chimani, Martin Horneffer, and Stefan Schnitter. Traffic engineering using segment routing and considering requirements of a carrier ip network. In *IFIP Networking Conference (IFIP Networking) and Workshops, 2017*, pages 1–9. IEEE, 2017.
- [5] S. Knight, H.X. Nguyen, N. Falkner, R. Bowden, and M. Roughan. The Internet Topology Zoo. *IEEE Journal on Selected Areas in Communications*, 29(9):1765 –1775, october 2011.
- [6] Nikola Gvozdiev, Stefano Vissicchio, Brad Karp, and Mark Handley. On low-latency-capable topologies, and their impact on the design of intra-domain routing. In *Proceedings of the 2018 Conference of the ACM Special Interest Group on Data Communication*, pages 88–102. ACM, 2018.
